# Supplementary material
Source: MDPI journal article supplement (https://www.mdpi.com/2071-1050/15/12/9772)
Supplement: s1 [file s1]

# **Co-Development of a Tool to Aid the Assessment of Biomass Potential for Sustainable Resource Utilization: An Exploratory Study with Danish and Swedish Municipalities**

**Andreas Dyreborg Martin**

Department of People and Technology (IMT), University of Roskilde (RUC), Universitetsvej 1,  
4000 Roskilde, Denmark; andyma@ruc.dk

**Table S1.** *Quantity potentials on biomass in Denmark*

| DENMARK                       |                          |                                                                                |
|-------------------------------|--------------------------|--------------------------------------------------------------------------------|
| Biomass                       | Data source              | Calculation basis                                                              |
| Pig slurry                    | Number of pigs [58]      | Quantity per pig [59]                                                          |
| Cattle manure                 | Number of cattles [58]   | Quantity per cattle [59]                                                       |
| Poultry manure                | Number of poultry [58]   | Quantity per poultry [59]                                                      |
| Fish waste from aquaculture   | Quantity of fish [58]    | Waste per quantity [60]                                                        |
| Roadside grass                | Length [61]              | Width<br>Yield [62]                                                            |
| Food waste from companies     | Municipal input          | Quantity based on companies' industry affiliation and number of employees [63] |
| Food waste from households    | Type of household [64]   | Quantity per type of household [65,66]                                         |
| Wheat straw                   | Area per type wheat [67] | Yield of straw per wheat yield [68]                                            |
| Green house waste             | Area of greenhouse [61]  | Quantity per area of greenhouse[69–72]                                         |
| Garden waste                  | Municipal input          | Actual input                                                                   |
| Wood waste                    | Area of forest [73]      | Yield distributed on type of wood [74,75]                                      |
| Hay                           | Area per type hay [67]   | Yield [76]                                                                     |
| Plant waste from water course | Area of watercourse [73] | Yield [77]                                                                     |
| Beach cast seaweed            | Length [78]              | Yield [78]                                                                     |

**Table S2.** Formula for quantity potentials on biomass in Denmark

| DENMARK                       |                                                                                                        |
|-------------------------------|--------------------------------------------------------------------------------------------------------|
| Biomass                       | Estimation - yearly                                                                                    |
| Pig slurry                    | $\sum Quantity_{pigs} * Slurry_{Barn\ System}$                                                         |
| Cattle manure                 | $\sum Quantity_{cattles} * Manure_{Barn\ system}$                                                      |
| Poultry manure                | $\sum Quantity_{poultry} * Poultry_{Barn\ system}$                                                     |
| Fish waste from aquaculture   | $\sum Weight_{fisht\ type, whole\ fish} * waste\ proportion$                                           |
| Roadside grass                | $\sum Length_{road\ type} * width_{road\ type} * yield_{road\ type}$                                   |
| Food waste from companies     | $\sum Number\ of\ employees_{industry\ affiliation} * Food\ waste\ production_{industry\ affiliation}$ |
| Food waste from households    | $\sum Quantity_{household\ type} * food\ waste\ production_{household\ type}$                          |
| Wheat straw                   | $\sum Yield_{straw\ type} * acreage_{straw\ type}$                                                     |
| Green house waste             | $\sum Waste_{crop} * acreage_{crop}$                                                                   |
| Garden waste                  | Total quantity gathered in municipality                                                                |
| Wood waste                    | Acreage * waste production                                                                             |
| Hay                           | $\sum Yield_{hay\ type} * acreage_{hay\ type}$                                                         |
| Plant waste from water course | Length * waste production                                                                              |
| Beach cast seaweed            | Quantity per municipality                                                                              |

**Table S3.** *Quantity potentials on biomass in Sweden*

| SWEDEN                        |                                              |                                                                                |
|-------------------------------|----------------------------------------------|--------------------------------------------------------------------------------|
| Biomass                       | Data source                                  | Calculation basis                                                              |
| Pig slurry                    | Number of pigs [79]                          | Quantity per pig [59]                                                          |
| Cattle manure                 | Number of cattles [79]                       | Quantity per cattle [59]                                                       |
| Poultry manure                | Number of poultry [79]                       | Quantity per poultry [59]                                                      |
| Fish waste from aquaculture   | N/A                                          | Waste per quantity [60]                                                        |
| Roadside grass                | Length [74,80]                               | Width and yield [62]                                                           |
| Food waste from companies     | Municipal input                              | Quantity based on companies' industry affiliation and number of employees [63] |
| Food waste from households    | Type of household or number of citizens [81] | Quantity per type of household or citizens [65,66,82]                          |
| Wheat straw                   | Area per type wheat [83]                     | Yield of straw per wheat yield [68]                                            |
| Garden waste                  | Municipal input                              | Actual input                                                                   |
| Wood waste                    | Area of forest [74]                          | Yield distributed on type of wood [74,75]                                      |
| Hay                           | Area per type hay [83]                       | Yield [76]                                                                     |
| Plant waste from water course | Length of water course [84]                  | Yield and width [74,77]                                                        |
| Beach cast seaweed            | Length [78]                                  | Yield [78]                                                                     |

**Table S4.** Formula for quantity potentials on biomass in Sweden

| SWEDEN                        |                                                                                                        |
|-------------------------------|--------------------------------------------------------------------------------------------------------|
| Biomass                       | Estimation - yearly                                                                                    |
| Pig slurry                    | $\sum Quantity_{pigs} * Slurry_{Barn\ System}$                                                         |
| Cattle manure                 | $\sum Quantity_{cattles} * Manure_{Barn\ system}$                                                      |
| Poultry manure                | $\sum Quantity_{poultry} * Poultry_{Barn\ system}$                                                     |
| Fish waste from aquaculture   | $\sum Weight_{fisht\ type, whole\ fish} * waste\ proportion$                                           |
| Roadside grass                | $\sum Length_{road\ type} * width_{road\ type} * yield_{road\ type} * regional\ growth\ estimation$    |
| Food waste from companies     | $\sum Number\ of\ employees_{industry\ affiliation} * Food\ waste\ production_{industry\ affiliation}$ |
| Food waste from households    | $\sum Quantity_{household\ type} * food\ waste\ production_{household\ type}$                          |
| Wheat straw                   | $\sum Yield_{straw\ type} * acreage_{straw\ type}$                                                     |
| Green house waste             | $\sum Waste_{crop} * acreage_{crop}$                                                                   |
| Garden waste                  | Total quantity gathered in municipality                                                                |
| Wood waste                    | Acreage * waste production * regional growth estimation                                                |
| Hay                           | $\sum Yield_{hay\ type} * acreage_{hay\ type}$                                                         |
| Plant waste from water course | Length * waste production * regional growth estimation                                                 |
| Beach cast seaweed            | Quantity per municipality                                                                              |

*Table S5. Carbon flow calculations on different applications*

| <b>CARBON FLOW</b>                 |                                                                      |
|------------------------------------|----------------------------------------------------------------------|
| <b>Application</b>                 | <b>Assumptions</b>                                                   |
| Waste incineration (CHP)           | Heat and power                                                       |
| Anaerobic digestion (Gas grid/CHP) | Gas grid or heat and power                                           |
| Fodder                             | No calculated                                                        |
| Biomass (HOP/CHP)                  | Heat and/or power                                                    |
| Fertilizer/Soil improvement        | No emission                                                          |
| Not collected                      | Methane emission                                                     |
| Application unknown                | Unknown flow                                                         |
| Composting                         | Methane emission [85,86]                                             |
| Pyrolysis (HOP)                    | Storage and district heating (T. P. Thomsen, Personel communication) |
| Bedding                            | Assumed no emission                                                  |
| Sold                               | Not accounted for                                                    |

*CHP: Combined Heat and Power*

*HOP: Heat only plants*

*Table S6. – Nutrient flow (Nitrogen, Phosphorous, and potassium) on different applications*

| <b>NUTRIENT RECOVERY</b>          |                                        |
|-----------------------------------|----------------------------------------|
| <b>Application</b>                | <b>Assumptions</b>                     |
| Waste incineration (CHP)          | Not recovered                          |
| Anaerobic digestion (Gasgrid/CHP) | No loss [87]                           |
| Fodder                            | Counted in fertilizer/soil improvement |
| Biomass (HOP/CHP)                 | Not recovered                          |
| Fertilizer/Soil improvement       | No loss                                |
| Not collected                     | Not recovered                          |
| Application unknown               | Not recovered                          |
| Composting                        | 10 % nitrogen loss [88]                |
| Pyrolysis (HOP)                   | 100 % Nitrogen loss [89]               |
| Bedding                           | Counted in fertilizer/soil improvement |
| Sold                              | Not recovered                          |

*CHP: Combined Heat and Power*

*HOP: Heat only plants*

**Table S7.** Dry matter, volatile solids and nutrients (nitrogen, phosphorous and potassium) in biomass

| Biomass                       | Extra classification                          | Dry Matter [%] | Volatile Solid of Dry Matter [%] | Nitrogen <sup>b</sup> [kg/tons] | Potassium <sup>b</sup> [kg/tons] | Phosphorus <sup>b</sup> [kg/tons] | Source                                                                                               |
|-------------------------------|-----------------------------------------------|----------------|----------------------------------|---------------------------------|----------------------------------|-----------------------------------|------------------------------------------------------------------------------------------------------|
| Pig slurry <sup>a</sup>       | Sows, gilts and boars                         | 4,5            | 87                               | 3,8                             | 1,7                              | 0,8                               | NPP+DM: [59]<br>VS: [90]                                                                             |
| Pig slurry <sup>a</sup>       | Pigs over 30 kg except sows, gilts and boars  | 6,6            | 87                               | 4,8                             | 2,6                              | 1,0                               | NPP+DM: [59]<br>VS: [90]                                                                             |
| Pig slurry <sup>a</sup>       | Piglets between 7 and 30 kg mellem 7 og 30 kg | 5,0            | 87                               | 3,3                             | 2,1                              | 0,9                               | NPP+DM: [59]<br>VS: [90]                                                                             |
| Cattle manure <sup>a</sup>    | Male                                          | 10,8           | 76                               | 10,8                            | 3,5                              | 0,9                               | NPP+DM: [59]<br>VS: [91]                                                                             |
| Cattle manure <sup>a</sup>    | Heifers                                       | 12,3           | 76                               | 12,3                            | 7,1                              | 0,9                               | NPP+DM: [59]<br>VS: [91]                                                                             |
| Cattle manure <sup>a</sup>    | Cows                                          | 12,1           | 76                               | 12,1                            | 8,3                              | 0,8                               | NPP+DM: [59]<br>VS: [91]                                                                             |
| Fish waste from aquaculture   |                                               | 50,0           | 95                               | 15,5                            | 0,6                              | 20,0                              | DM: [92] (Fish sediment)<br>NPP: [93]<br>DM: [94]<br>NPP: [91]<br>VS+DM: [95]                        |
| Wheat straw                   |                                               | 89,5           | 76                               | 9,1                             | 20,5                             | 0,8                               | DM+VS: [94] (Garden waste)<br>NPP: [96] (Wheat Straw)<br>DM + VS: [94]<br>VS: [97] (Pine wood, 1 mm) |
| Green house waste             |                                               | 89,5           | 76                               | 9,1                             | 20,5                             | 0,8                               | DM: [98] (Mixed Hardwood chips)<br>NPP: [99]<br>VS+DM: [95]                                          |
| Garden waste                  |                                               | 30,0           | 90                               |                                 |                                  |                                   | NPP: [96]                                                                                            |
| Wood waste                    |                                               | 93,0           | 86                               | 1,4                             | 1,2                              | 0,1                               | NPP: [99]<br>VS+DM: [95]                                                                             |
| Hay                           |                                               | 89,5           | 76                               | 9,1                             | 20,5                             | 0,8                               | NPP: [96]                                                                                            |
| Plant waste from water course |                                               | 31,0           | 90                               | 1,0                             | 9,9                              | 2,3                               | DM+VS: [94]<br>NPP: [100] (Verge grass)                                                              |
| Beach cast seaweed            |                                               | 58,0           | 90                               | 1,8                             | 3,2                              | 0,2                               | DM+VS: [94]<br>NPP: [101] (Appendix 7)                                                               |

|                             |                     |      |    |      |      |     |                                              |
|-----------------------------|---------------------|------|----|------|------|-----|----------------------------------------------|
| Roadside grass              | Minor road (spring) | 18,7 | 92 | 0,3  | 0,9  | 0,3 | DM+VS: [62]<br>NPP: [100]                    |
| Roadside grass              | Main road (spring)  | 26,3 | 89 | 0,4  | 1,3  | 0,4 | DM+VS: [62]<br>NPP: [100]                    |
| Roadside grass              | Highway (spring)    | 25,7 | 94 | 0,4  | 1,2  | 0,4 | DM+VS: [62]<br>NPP: [100]                    |
| Roadside grass              | Minor road (autumn) | 18,7 | 85 | 0,3  | 0,9  | 0,3 | DM+VS: [62]<br>NPP: [100]                    |
| Roadside grass              | Main road (autumn)  | 24,5 | 77 | 0,3  | 1,1  | 0,4 | DM+VS: [62]<br>NPP: [100]                    |
| Roadside grass              | Highway (autumn)    | 28,4 | 90 | 0,4  | 1,3  | 0,5 | DM+VS: [62]<br>NPP: [100]                    |
| Food waste                  |                     | 30,0 | 85 | 5,4  | 2,0  | 0,7 | TS, VS: [94]<br>NPP: [102] (Analysis report) |
| Poultry manure <sup>a</sup> | Meat production     | 48,0 | 87 | 18,4 | 9,0  | 5,5 | NPP+TS: [59]<br>VS: [103]                    |
| Poultry manure <sup>a</sup> | Egg production      | 40,0 | 87 | 22,8 | 17,6 | 7,0 | NPP+TS[59]<br>VS: [103]                      |

---

*NPP: Nitrogen, Potassium, and Phosphorous*

*VS: Volatile Solids*

*DM: Dry Matter*

<sup>a</sup> *Varies depending on chosen animal setup for pigsty's, cowsheds, and poultry farms.*

<sup>b</sup> *Dry matter dependent*

**Table S8.** Biomethanepotential and gross calorific value in biomass

| Biomass                       | Extra classification                          | Biomethane-potential<br>[nm3/tons vs] | Gross calorific value<br>(HHV)<br>[MJ/kg TS] | Source                                                                                                   |
|-------------------------------|-----------------------------------------------|---------------------------------------|----------------------------------------------|----------------------------------------------------------------------------------------------------------|
| Pig slurry                    | Sows, gilts and boars                         | 230                                   | 12,8                                         | BMP: [104] (Scrutiny figure 1: "So" - 30 days digestion)<br>HHV: [105]                                   |
| Pig slurry                    | Pigs over 30 kg except sows, gilts and boars  | 200                                   | 12,8                                         | BMP: [104] (Scrutiny figure 1: "So" - 30 days digestion)<br>HHV: [105]                                   |
| Pig slurry                    | Piglets between 7 and 30 kg mellem 7 og 30 kg | 260                                   | 12,8                                         | BMP: [104] (Scrutiny figure 1: "So" - 30 days digestion)<br>HHV: [105]                                   |
| Cattle manure                 | Male                                          | 250                                   | 16,9                                         | HHV: [106]<br>BMP: [107]                                                                                 |
| Cattle manure                 | Heifers                                       | 250                                   | 16,9                                         | HHV: [106]<br>BMP: [107]                                                                                 |
| Cattle manure                 | Cows                                          | 250                                   | 16,9                                         | HHV: [106]<br>BMP: [107]                                                                                 |
| Fish waste from aquaculture   |                                               | 600                                   | 20,0                                         | BMP: [94]<br>HHV: [108] (Supplementary material)                                                         |
| Wheat straw                   |                                               | 228                                   | 17,2                                         | HHV: [109]                                                                                               |
| Green house waste             |                                               | 175                                   | 18,4                                         | BMP: [110] (After hammer mill)<br>BMP: [94] (Garden waste)                                               |
| Garden waste                  |                                               | 175                                   | 19,7                                         | HHV: [111] (Hay)<br>BMP: [94]                                                                            |
| Wood waste                    |                                               | 65                                    | 19,0                                         | HHV: [111] (Hay)<br>HHV: [112] (Wood trimmings incl. Bark)<br>BMP: [97] (Pine wood, 1 mm)                |
| Hay                           |                                               | 306                                   | 18,4                                         | BMP: [62]<br>HHV: [111]                                                                                  |
| Plant waste from water course |                                               | 400                                   | 18,0                                         | BMP: [94]<br>HHV: [113] (Verge grass)                                                                    |
| Beach cast seaweed            |                                               | 99                                    | 23,5                                         | BMP: [101] (On land <2 from shore. Eelgrass (50-80 %), dead man's rope (0-10 %), toothed wrack (0-10 %)) |

|                |                     |     |      |  |                                             |
|----------------|---------------------|-----|------|--|---------------------------------------------|
|                |                     |     |      |  | %), mung (20-30 %), Bladder wrack (0-10 %)) |
|                |                     |     |      |  | HHV: [114]                                  |
| Roadside grass | Minor road (spring) | 306 | 18,0 |  | BMP: [62]                                   |
|                |                     |     |      |  | HHV: [113]                                  |
| Roadside grass | Main road (spring)  | 306 | 18,0 |  | BMP: [62]                                   |
|                |                     |     |      |  | HHV: [113]                                  |
| Roadside grass | Highway (spring)    | 306 | 18,0 |  | BMP: [62]                                   |
|                |                     |     |      |  | HHV: [113]                                  |
| Roadside grass | Minor road (autumn) | 306 | 18,0 |  | BMP: [62]                                   |
|                |                     |     |      |  | HHV: [113]                                  |
| Roadside grass | Main road (autumn)  | 306 | 18,0 |  | BMP: [62]                                   |
|                |                     |     |      |  | HHV: [113]                                  |
| Roadside grass | Highway (autumn)    | 306 | 18,0 |  | BMP: [62]                                   |
|                |                     |     |      |  | HHV: [113]                                  |
| Food waste     |                     | 340 | 15,9 |  | BMP: [94]                                   |
|                |                     |     |      |  | HHV: [115]                                  |
| Poultry manure | Meat production     | 259 | 17,1 |  | BMP: [103]                                  |
|                |                     |     |      |  | HHV: [116] (Supplementary material)         |
| Poultry manure | Egg production      | 259 | 14,0 |  | BMP: [103]                                  |
|                |                     |     |      |  | HHV: [116] (Supplementary material)         |

---

**Table S9.** Content of carbon, hydrogen, oxygen, nitrogen and sulphur in biomass

| Biomass                       | Extra classification                          | Carbon<br>[% af DM] | Hydrogen<br>[% af DM] | Oxygen<br>[% af DM] | Nitrogen<br>[% af DM] | Sulphur<br>[% af DM] | Source                               |
|-------------------------------|-----------------------------------------------|---------------------|-----------------------|---------------------|-----------------------|----------------------|--------------------------------------|
| Pig slurry                    | Sows, gilts and boars                         | 43,7                | 4,2                   | 33,5                | 2,5                   | 0,5                  | [117]                                |
| Pig slurry                    | Pigs over 30 kg except sows, gilts and boars  | 43,7                | 4,2                   | 33,5                | 2,5                   | 0,5                  | [117]                                |
| Pig slurry                    | Piglets between 7 and 30 kg mellem 7 og 30 kg | 43,7                | 4,2                   | 33,5                | 2,5                   | 0,5                  | [117]                                |
| Cattle manure                 | Male                                          | 44,7                | 5,9                   | 38,2                | 2,1                   | 0,3                  | [105]                                |
| Cattle manure                 | Heifers                                       | 44,7                | 5,9                   | 38,2                | 2,1                   | 0,3                  | [105]                                |
| Cattle manure                 | Cows                                          | 44,7                | 5,9                   | 38,2                | 2,1                   | 0,3                  | [105]                                |
| Fish waste from aquaculture   |                                               | 44,9                | 6,2                   | 35,5                | 12,9                  | 0,5                  | [108]<br>(Supplementary material)    |
| Wheat straw                   |                                               | 47,5                | 5,7                   | 48,3                | 0,6                   | 0,1                  | [118]                                |
| Green house waste             |                                               | 44,8                | 5,0                   | 42,5                | 1,6                   | 0,1                  | [111] (Hay)                          |
| Garden waste                  |                                               | 46,9                | 6,1                   | 40,6                | 0,9                   | 0,4                  | [119]                                |
| Wood waste                    |                                               | 49,2                | 6,4                   | 35,4                | 0,3                   | 0,1                  | [112]<br>(Wood trimmings incl. Bark) |
| Hay                           |                                               | 44,8                | 5,0                   | 42,5                | 1,6                   | 0,1                  | [111]                                |
| Plant waste from water course |                                               | 44,6                | 5,9                   | 38,9                | 1,9                   | 0,1                  | [120]<br>(Verge grass)               |
| Beach cast seaweed            |                                               | 21,6                | 2,4                   | 26,9                | 1,2                   | 0,0                  | [121]                                |
| Roadside grass                | Minor road (spring)                           | 44,6                | 5,9                   | 38,9                | 1,9                   | 0,1                  | [120]                                |

|                |                     |      |     |      |     |     |                                   |
|----------------|---------------------|------|-----|------|-----|-----|-----------------------------------|
| Roadside grass | Main road (spring)  | 44,6 | 5,9 | 38,9 | 1,9 | 0,1 | [120]                             |
| Roadside grass | Highway (spring)    | 44,6 | 5,9 | 38,9 | 1,9 | 0,1 | [120]                             |
| Roadside grass | Minor road (autumn) | 44,6 | 5,9 | 38,9 | 1,9 | 0,1 | [120]                             |
| Roadside grass | Main road (autumn)  | 44,6 | 5,9 | 38,9 | 1,9 | 0,1 | [120]                             |
| Roadside grass | Highway (autumn)    | 44,6 | 5,9 | 38,9 | 1,9 | 0,1 | [120]                             |
| Food waste     |                     | 48,1 | 5,9 | 40,7 | 0,7 | 0,0 | [115]                             |
| Poultry manure | Meat production     | 37,4 | 5,0 | 28,2 | 4,6 | 0,7 | [116]<br>(Supplementary material) |
| Poultry manure | Egg production      | 37,4 | 5,0 | 28,2 | 4,6 | 0,7 | [116]<br>(Supplementary material) |

---

*DM: Dry Matter*

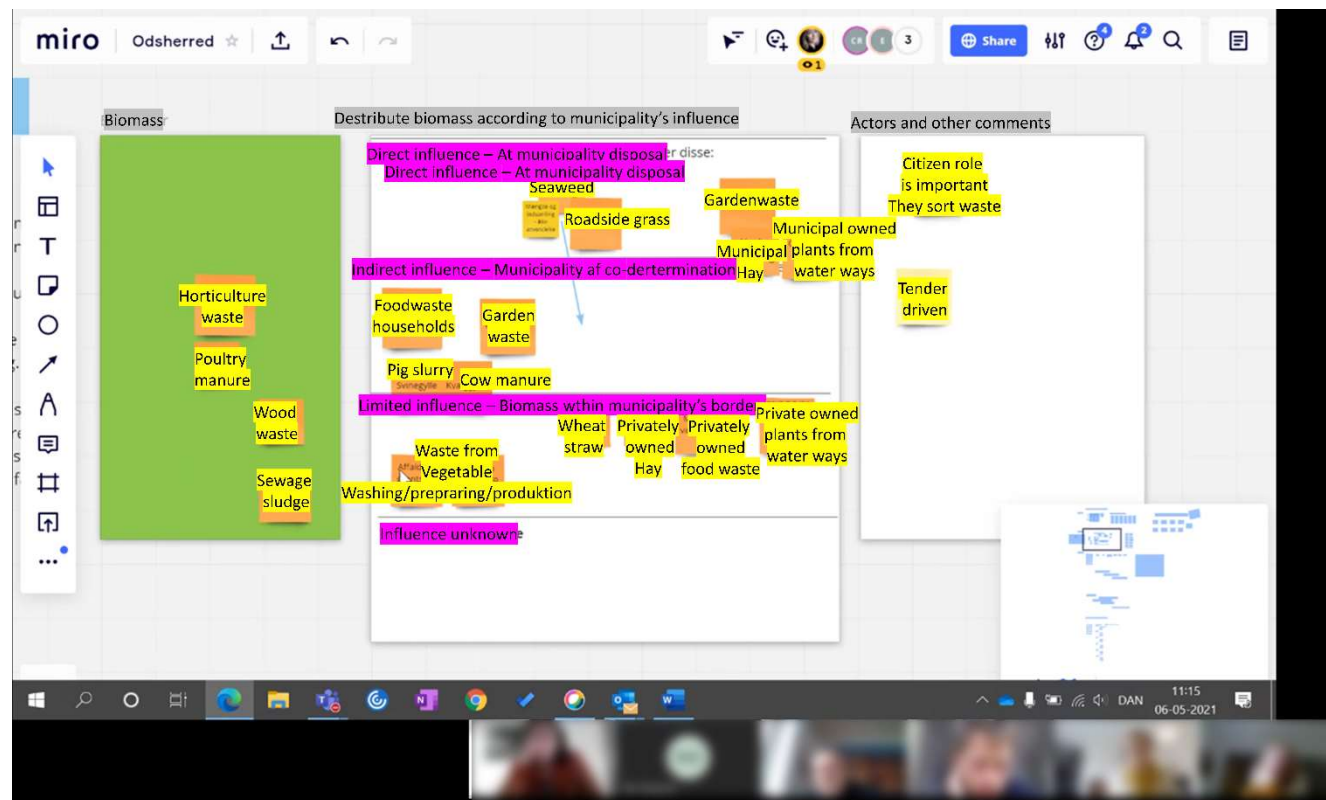

**Figure S1.** W3: Participants characterizing the municipalities influence over biomass in MIRO. Image translated from Danish to English.

## References

58. Danish veterinary and food administration CHR Available online: <https://chr.fvst.dk/chri/faces/frontpage> (accessed on 28 July 2022).
59. Børsting, C.F.; Hellwing, A.L.F. Normtal 2021. 2021. Available online: [https://anis.au.dk/fileadmin/DJF/Anis/dokumenter\\_anis/normtal/normtal\\_2021/normtal\\_fra\\_anne\\_louise/Normer\\_ANIS\\_hjemmeside\\_excel\\_version\\_171221.pdf](https://anis.au.dk/fileadmin/DJF/Anis/dokumenter_anis/normtal/normtal_2021/normtal_fra_anne_louise/Normer_ANIS_hjemmeside_excel_version_171221.pdf) (accessed on 28 July 2022).
60. Illera-Vives, M.; Seoane Labandeira, S.; Brito, L.M.; López-Fabal, A.; López-Mosquera, M.E. Evaluation of Compost from Seaweed and Fish Waste as a Fertilizer for Horticultural Use. *Sci Hortic* **2015**, *186*, 101–107, doi:10.1016/j.scienta.2015.02.008.
61. Agency for Data Supply and Infrastructure Kortforsyningen Download | Available online: <https://download.kortforsyningen.dk/forside> (accessed on 28 July 2022).
62. Meyer, A.K.P.; Ehimen, E.A.; Holm-Nielsen, J.B. Bioenergy Production from Roadside Grass: A Case Study of the Feasibility of Using Roadside Grass for Biogas Production in Denmark. *Resour Conserv Recycl* **2014**, *93*, 124–133, doi:10.1016/j.resconrec.2014.10.003.
63. Kaysen, O. Opgørelse Af Organisk Affald i Servicesektoren (Document Can Be Provided by Author). **2017**.

64. Statistics Denmark Boligbestanden - Danmarks Statistik Available online: <https://www.dst.dk/da/Statistik/emner/borgere/boligforhold/boligbestanden> (accessed on 28 July 2022).
65. Mønsted, C.; Larsen, C.; Bøgelund, M.; Johnsen, H.; Jørgensen, H. Effektiviseringspotentialet Ved Kommunal Affaldsindsamling. **2019**, Available online: <https://www2.mst.dk/Udgiv/publikationer/2017/08/978-87-93614-18-5.pdf> (accessed on 15 June 2023).
66. Lerche, F.; Petersen, C.; Econet; Tønning, K. Kortlægning Af Sæmning Af Dagrenovation Og Kildesorteret Organisk Affald Fra Husholdninger. **2018**, Available online: <https://www2.mst.dk/udgiv/publikationer/2018/03/978-87-93614-78-9.pdf> (accessed on 15 June 2023).
67. Danish Agricultural Agency LandbrugsGIS - Download Kortdata - Landbrugsstyrelsen Available online: <https://landbrugsgeodata.fvm.dk/> (accessed on 28 July 2022).
68. SEGES Farmtal Online Available online: <https://farmtalonline.dlbr.dk/Navigation/NavigationTree.aspx> (accessed on 28 July 2022).
69. Statistics Denmark Vegetabilsk Produktion Available online: <https://www.dst.dk/da/Statistik/emner/erhvervsliv/landbrug-gartneri-og-skovbrug/vegetabilsk-produktion> (accessed on 28 July 2022).
70. Kaiser, E.; Weerheim, K.; Schipper, R.; Dieleman, J.A. Partial Replacement of Red and Blue by Green Light Increases Biomass and Yield in Tomato. *Sci Hortic* **2019**, 249, 271–279, doi:10.1016/j.scienta.2019.02.005.
71. Dieleman, J.A.; Gelder, A. de; Eveleens, B.A.; Elings, A.; Janse, J.; Lagas, P.; Qian, T.; Steenhuizen, J.W.; Meinen, E. Tomaten Telen in Een Geconditioneerde Kas: Groei, Productie En Onderliggende Processen - WUR. Wageningen University & Research **2009**.
72. Marcelis, L.F.M. Fruit Growth and Dry Matter Partitioning in Cucumber. Wageningen Agricultural University **1994**.
73. Statistics Denmark Arealopgørelser - Danmarks Statistik Available online: <https://www.dst.dk/da/Statistik/emner/miljoe-og-energi/areal/arealopgoerelser> (accessed on 28 July 2022).
74. Nilsson, P.; Roberge, C.; Fridman, J. Skogsdata 2020. **2020** Available online: [https://www.slu.se/globalassets/ew/org/centrb/rt/dokument/skogsdata/skogsdata\\_2020\\_webb.pdf](https://www.slu.se/globalassets/ew/org/centrb/rt/dokument/skogsdata/skogsdata_2020_webb.pdf) (accessed on 15 June 2023).
75. IRENA BIOENERGY FROM BOREAL FORESTS Swedish Approach to Sustainable Wood Use BIOENERGY FROM BOREAL FORESTS. **2019** Available online: [https://www.irena.org/-/media/Files/IRENA/Agency/Publication/2019/Mar/IRENA\\_Swedish\\_forest\\_bioenergy\\_2019.pdf?rev=5b9d9f8da56c438b97be3eedba40e5a](https://www.irena.org/-/media/Files/IRENA/Agency/Publication/2019/Mar/IRENA_Swedish_forest_bioenergy_2019.pdf?rev=5b9d9f8da56c438b97be3eedba40e5a) (accessed on 15 June 2023).
76. Aarhus Universitet; SEGES; Københavns Universitet Procedurer for Indstilling Af Kvalstof-Og Udbyttentormer. **2018** Available online: [https://dca.au.dk/fileadmin/user\\_upload/NH/Myndighed/Drejebog\\_Gaeldende\\_fra\\_november\\_2018.pdf](https://dca.au.dk/fileadmin/user_upload/NH/Myndighed/Drejebog_Gaeldende_fra_november_2018.pdf) (accessed on 15 June 2023).
77. Bach, H.; Baattrup-Pedersen, A.; Holm, P.E.; Jensen, P.N.; Larsen, T.; Ovesen, N.B.; Petersen, M.L.; Sand-Jensen, K.; Styczen, M. FAGLIG UDREDNING OM GRØDESKAERING I VANDLØB. **2016** Available online: <https://mst.dk/media/114793/faglig-udredning-om-groedeskaering-i-vandloeb-d-14062016.pdf> (accessed on 15 June 2023).
78. Hansen, M.D.; Kjær, T. A Report on Beach Cleaning and Pre-Treatment of Seaweed Deliverable 4.1; **2020**.
79. Swedish Board of Agriculture Antal Djur Efter Kommun, Djurslag Och År. 1981-2020 Available online: [https://statistik.sjv.se/PXWeb/pxweb/sv/Jordbruksverkets%20statistikdatabas/Jordbruksverkets%20statistikdatabas\\_\\_Lantbrukets%20djur\\_\\_Lantbruksdjur%20i%20juni/JO0103F05.px/](https://statistik.sjv.se/PXWeb/pxweb/sv/Jordbruksverkets%20statistikdatabas/Jordbruksverkets%20statistikdatabas__Lantbrukets%20djur__Lantbruksdjur%20i%20juni/JO0103F05.px/) (accessed on 28 July 2022).
80. OpenStreetMap Denmark Available online: <http://download.geofabrik.de/europe.html> (accessed on 29 July 2022).
81. Statistics Sweden Hushållens Boende Available online: <https://www.scb.se/hitta-statistik/statistik-efter-amne/hushallens-ekonomi/inkomster-och-inkomstfordelning/hushallens-boende/> (accessed on 29 July 2022).
82. Swedish Environmental Protection Agency Matavfall i Sverige - Uppkomst Och Behandling 2018; **2018**; ISBN 9789162088613.
83. Swedish Board of Agriculture Åkerarealens Användning Efter Kommun, Gröda Och År. 1981-2021 Available online: [https://statistik.sjv.se/PXWeb/pxweb/sv/Jordbruksverkets%20statistikdatabas/Jordbruksverkets%20statistikdatabas\\_\\_Arealer\\_\\_1%20Riket%20i%20C3%A4n%20kommun/JO0104B2.px/?rxid=5adf4929-f548-4f27-9bc9-78e127837625](https://statistik.sjv.se/PXWeb/pxweb/sv/Jordbruksverkets%20statistikdatabas/Jordbruksverkets%20statistikdatabas__Arealer__1%20Riket%20i%20C3%A4n%20kommun/JO0104B2.px/?rxid=5adf4929-f548-4f27-9bc9-78e127837625) (accessed on 28 July 2022).
84. Swedish Meteorological and Hydrological Institute Utforskaren - Öppna Data | SMHI Available online: <https://www.smhi.se/data/utforskaren-oppna-data/vattendrag-natverk-svar2016> (accessed on 29 July 2022).

85. Pipatti, R.; Alves, J.W.S.; Gao, Q.; Cabrera, C.L.; Mareckova, K.; Oonk, H.; Scheehle, E.; Sharma, C.; Smith, A.; Svandal, P.; et al. IPCC Guidelines for National Greenhouse Gas. **2006**, 5.
86. Cao, Y.; Wang, X.; Bai, Z.; Chadwick, D.; Misselbrook, T.; G. Sommer, S.; Qin, W.; Ma, L. Mitigation of Ammonia, Nitrous Oxide and Methane Emissions during Solid Waste Composting with Different Additives: A Meta-Analysis. *J Clean Prod* **2019**, 235, 626–635, doi:10.1016/j.jclepro.2019.06.288.
87. Holm-Nielsen, J.B.; Al Seadi, T.; Oleskowicz-Popiel, P. The Future of Anaerobic Digestion and Biogas Utilization. *Bioresour Technol*, **2009**, 100, 5478–5484, doi:10.1016/j.biortech.2008.12.046.
88. Yang, X.; Liu, E.; Zhu, X.; Wang, H.; Liu, H.; Liu, X.; Dong, W. Impact of Composting Methods on Nitrogen Retention and Losses during Dairy Manure Composting. *Int J Environ Res Public Health* **2019**, 16, doi:10.3390/ijerph16183324.
89. Henriksen, U.B.; Ahrenfeldt, J.; Gadsbøll, R.; Clausen, L.R.; Stiesdal, H.; Hauggaard-Nielsen, H.; Müller-Stöver, D.S.; Bruun, S. Reduktion Af Landbrugets Klimaafttryk Ved Termisk Pyrolyse Af Afgrøderester Og Organiske Gødningsfraktioner. Roskilde Universitet **2019**.
90. He, B.J.; Zhang, Y.; Funk, T.L.; Riskowski, G.L.; Yin, Y. Thermochemical Conversion of Swine Manure: An Alternative Process for Waste Treatment and Renewable Energy Production. *Transactions of the ASAE* **2000**, 43, 1827–1833. doi:10.13031/2013.3087
91. Alvarez, R.; Lidén, G. Low Temperature Anaerobic Digestion of Mixtures of Llama, Cow and Sheep Manure for Improved Methane Production. *Biomass Bioenergy* **2009**, 33, 527–533, doi:10.1016/j.biombioe.2008.08.012.
92. Ahuja, I.; Ween, O.; Ebbesvik, M.; Kvande, I.; de Boer, A.; Petter Ahlin, J. Fish Waste as Fertiliser-Effect of Drying Methods on Fish Waste and Supplementing Fish Waste with Other Residual Raw Materials to Form an Organic Fertiliser; **2021**; ISBN 9788282021265.
93. Hummelshøj, R.M. Udvikling Af Metoder Til Udnyttelse Af Animalsk Affald i Biogas Og Udvinding Af Fosfor Fra Kød-Og Benmelsforbraending. Miljøstyrelsen **2004**, Available online: <https://www2.mst.dk/Udgiv/publikationer/2004/87-7614-282-5/html/helepubl.htm> (accessed on 15 June 2023).
94. Miljøstyrelsen PERFORMANCE BENCHMARKING ENERGIGEVINST VED EKSTERN BIOMASSE OG ENERGIINDHOLD I ENERGIKILDER; **2017**, Available online: <https://mst.dk/media/147715/performance-benchmarking-energigevinst-ved-ekstern-biomasse-og-energiind.pdf> (accessed on 15 June 2023).
95. Kurkela, E.; Moilanen, A.; Nieminen, M. CFB Gasification of Biomass Residues for Co-Combustion in Large Utility Boilers: Studies on Ash Control and Gas Cleaning — VTT's Research Information Portal. *Power Production from Biomass III*. **1999**, 192, 213–228.
96. ECN Wheat Straw Waste (#2039) Available online: <https://phyllis.nl/Biomass/View/2039> (accessed on 3 August 2022).
97. Salehian, P.; Karimi, K.; Zilouei, H.; Jeyhanipour, A. Improvement of Biogas Production from Pine Wood by Alkali Pretreatment. *Fuel* **2013**, doi:10.1016/j.fuel.2012.12.092.
98. Feldmann, H.F.; Paisley, M.A.; Appelbaum, H.R.; Taylor, D.R. Conversion of Forest Residues to a Methane-Rich Gas in a High-Throughput Casif Ier; **1988** Available online <https://www.osti.gov/servlets/purl/7150257> (accessed on 15 June 2022).
99. ECN Wood, Beech Chips, Rettenmayer (#2215) Available online: <https://phyllis.nl/Biomass/View/2215> (accessed on 3 August 2022).
100. Frydam Lydia Phyllis2 - Verge Grass, Fresh (#3548) Available online: <https://phyllis.nl/Biomass/View/3548> (accessed on 3 August 2022).
101. Martin, A.D.; Skøt, M.K. Potentialet for Tang Fra Sejerøbugten Som Biomasse i Odsherred Biogasanlæg; Roskilde, **2017** Available online: [https://rucforsk.ruc.dk/ws/files/60947147/Samlet\\_Opgave\\_fardig.pdf](https://rucforsk.ruc.dk/ws/files/60947147/Samlet_Opgave_fardig.pdf) (accessed on 3 August 2022).
102. Affaldplus Madaffald - AffaldPlus (Document Can Be Provided by Author); **2018**.
103. Kafle, G.K.; Chen, L. Comparison on Batch Anaerobic Digestion of Five Different Livestock Manures and Prediction of Biochemical Methane Potential (BMP) Using Different Statistical Models. *Waste Management* **2016**, 48, 492–502, doi:10.1016/j.wasman.2015.10.021.
104. Møller, H.B. Husdyrgødning Kan Give Mere Gas; **2010** Available online <https://lemvigbiogas.com/wp-content/uploads/2021/01/FiB-nr.-34-2010-DK.pdf> (accessed on 15 June 2022).
105. ECN Pig Manure (#1366) Available online: <https://phyllis.nl/Biomass/View/1366> (accessed on 3 August 2022).
106. Young, L.; Pian, C.C.P. High-Temperature, Air-Blown Gasification of Dairy-Farm Wastes for Energy Production. *Energy*. **2003** 28, 655–672, doi:10.1016/S0360-5442(03)00004-5.
107. Birkmose, T.; Hjort-Gregersen, K.; Stefanek, K. Biomasse Til Biogasanlæg i Danmark - På Kort Og Langt Sigt; **2013** Available online [https://ens.dk/sites/ens.dk/files/Bioenergi/biomasser\\_til\\_biogasanlaeg.pdf](https://ens.dk/sites/ens.dk/files/Bioenergi/biomasser_til_biogasanlaeg.pdf) (accessed on 15 June 2022).

108. Kannan, S.; Gariepy, Y.; Vijaya Raghavan, G.S. Optimization of the Conventional Hydrothermal Carbonization to Produce Hydrochar from Fish Waste. *Biomass Convers Biorefin* **2018**, *8*, 563–576, doi:10.1007/s13399-018-0323-9.
109. van der Drift, A.; Olsen, A. CONVERSION OF BIOMASS, PREDICTION AND SOLUTION METHODS FOR ASH AGGLOMERATION AND RELATED PROBLEMS; **1999**.
110. Bjarne Møller, H.; Romio, C.; Rasmussen, M.D.; Jensen, L.S.; Schwartzkopff, M.; Holm-Nielsen, J.B.; Agdal, E.B.L.; Larsen, S.U.; Hinge, J. HALM TIL BIOGAS; **2020** Available online [https://www.teknologisk.dk/\\_media/81966\\_Rapport%20-%20Halm%20til%20biogas%2C%20erfaringer%20og%20klima-aspekter.pdf](https://www.teknologisk.dk/_media/81966_Rapport%20-%20Halm%20til%20biogas%2C%20erfaringer%20og%20klima-aspekter.pdf) (accessed on 15 June 2022).
111. ECN Hay (#524) Available online: <https://phyllis.nl/Biomass/View/524> (accessed on 4 August 2022).
112. ECN Wood Trimmings Incl. Bark (#1867) Available online: <https://phyllis.nl/Biomass/View/1867> (accessed on 4 August 2022).
113. Ligthart, F. Verge Grass (#987) Available online: <https://phyllis.nl/Biomass/View/987> (accessed on 4 August 2022).
114. ECN Microalgae (#1921) Available online: <https://phyllis.nl/Biomass/View/1921> (accessed on 4 August 2022).
115. ECN Domestic Organic Waste from Municipal Collection (#393) Available online: <https://phyllis.nl/Biomass/View/393> (accessed on 4 August 2022).
116. Qian, X.; Lee, S.; Soto, A.M.; Chen, G. Regression Model to Predict the Higher Heating Value of Poultry Waste from Proximate Analysis. *Resources* **2018**, *7*, doi:10.3390/resources7030039.
117. ECN Pig Manure (#1715) Available online: <https://phyllis.nl/Biomass/View/1715> (accessed on 4 August 2022).
118. ECN Wheat Straw (Danish) (#1871) Available online: <https://phyllis.nl/Biomass/View/1871> (accessed on 4 August 2022).
119. Ipiales, R.P.; Mohedano, A.F.; Diaz, E.; de la Rubia, M.A. Energy Recovery from Garden and Park Waste by Hydrothermal Carbonisation and Anaerobic Digestion. *Waste Management* **2022**, *140*, 100–109, doi:10.1016/j.wasman.2022.01.003.
120. Faaij, A.; Van Ree, R.; Waldheim, L.; Olsson, E.; Oudhuis, A.; Van Wijk, A.; Daey-Ouwens, C.; Turkenburg, W. Gasification of Biomass Wastes and Residues for Electricity Production. *Biomass Bioenergy* **1997**, *12*, 387–407, doi:10.1016/S0961-9534(97)00010-X.
121. Lymperatou, A.; Engelsens, T.K.; Skiadas, I. V.; Gavala, H.N. Different Pretreatments of Beach-Cast Seaweed for Biogas Production. *J Clean Prod* **2022**, *362*, 132277, doi.org/10.1016/j.jclepro.2022.132277.
